# Supplementary material for: Histological Analysis of Gonadal Ridge Development and Sex Differentiation of Gonads in Three Gecko Species
Source: MDPI journal article supplement (doi:10.3390/biology13010007), 2023-12-22
Supplement: s1 [file s1]

Suppl. Table S1. Number of specimen analysed.

| Stages                                                                                    | Days of incubation | Specimen with undifferentiated gonads | Specimen with ovaries | Specimen with testes | Sum of specimen studied |
|-------------------------------------------------------------------------------------------|--------------------|---------------------------------------|-----------------------|----------------------|-------------------------|
| Crested gecko ( <i>Correlophus ciliatus</i> )                                             |                    |                                       |                       |                      |                         |
| S29                                                                                       | D5                 | 2                                     | 0                     | 0                    | 2                       |
| S30                                                                                       | D6                 | 3                                     | 0                     | 0                    | 3                       |
| S31                                                                                       | D7                 | 2                                     | 0                     | 0                    | 2                       |
| S32                                                                                       | D8                 | 3                                     | 0                     | 0                    | 3                       |
| S32                                                                                       | D9                 | 4                                     | 0                     | 0                    | 4                       |
| S32                                                                                       | D10                | 1                                     | 3                     | 2                    | 6                       |
| S34                                                                                       | D15                | 0                                     | 2                     | 3                    | 5                       |
| S35                                                                                       | D17                | 0                                     | 0                     | 1                    | 1                       |
| S35                                                                                       | D18                | 0                                     | 3                     | 2                    | 5                       |
| S36                                                                                       | D22                | 0                                     | 0                     | 1                    | 1                       |
| S36                                                                                       | D25                | 0                                     | 2                     | 2                    | 4                       |
| Leopard gecko ( <i>Eublepharis macularius</i> ) 26°C – female producing temperature (FPT) |                    |                                       |                       |                      |                         |
| S29                                                                                       | D5                 | 1                                     | 0                     | 0                    | 1                       |
| S30                                                                                       | D6                 | 2                                     | 0                     | 0                    | 2                       |
| S31                                                                                       | D10                | 2                                     | 0                     | 0                    | 2                       |
| S32                                                                                       | D15                | 1                                     | 0                     | 0                    | 1                       |
| S33                                                                                       | D20                | 0                                     | 2                     | 1                    | 3                       |
| S35                                                                                       | D26                | 0                                     | 2                     | 0                    | 2                       |
| S37                                                                                       | D30                | 0                                     | 3                     | 0                    | 3                       |
| Leopard gecko ( <i>Eublepharis macularius</i> ) 32°C – male producing temperature (MPT)   |                    |                                       |                       |                      |                         |
| S29                                                                                       | D4                 | 1                                     | 0                     | 0                    | 1                       |
| S30                                                                                       | D5                 | 2                                     | 0                     | 0                    | 2                       |
| S31                                                                                       | D7                 | 2                                     | 0                     | 0                    | 2                       |
| S32                                                                                       | D10                | 1                                     | 0                     | 2                    | 3                       |
| S34                                                                                       | D15                | 0                                     | 0                     | 2                    | 2                       |
| S35                                                                                       | D20                | 0                                     | 0                     | 1                    | 1                       |
| S37                                                                                       | D27                | 0                                     | 1                     | 1                    | 2                       |
| S41                                                                                       | D35                | 0                                     | 0                     | 2                    | 2                       |
| Mourning gecko ( <i>Lepidodactylus lugubris</i> )                                         |                    |                                       |                       |                      |                         |
| S29                                                                                       | D7                 | 2                                     | 0                     | 0                    | 2                       |
| S30                                                                                       | D10                | 1                                     | 0                     | 0                    | 1                       |
| S31                                                                                       | D20                | 2                                     | 1                     | 0                    | 3                       |
| S32                                                                                       | D25                | 0                                     | 3                     | 0                    | 3                       |
| S33                                                                                       | D30                | 0                                     | 3                     | 0                    | 3                       |
| S34                                                                                       | D40                | 0                                     | 3                     | 0                    | 3                       |
| S36                                                                                       | D50                | 0                                     | 2                     | 0                    | 2                       |
| S38                                                                                       | D55                | 0                                     | 2                     | 0                    | 2                       |

Suppl. Table S2. Measurements of sizes and germ cell number in gonads at the stage of sex differentiation.

| Measurement                                                                               | Crested gecko<br>( <i>Correlophus ciliatus</i> )<br>N=6 | Leopard gecko<br>( <i>Eublepharis macularius</i> )<br>N=6 | Mourning gecko<br>( <i>Lepidodactylus lugubris</i> )<br>N=3 |
|-------------------------------------------------------------------------------------------|---------------------------------------------------------|-----------------------------------------------------------|-------------------------------------------------------------|
| Mean thickness of the coelomic epithelium covering the gonadal ridge                      | 8.78 ± 2.74 µm                                          | 8.58 ± 3.03 µm                                            | 9.82 ± 2.95 µm                                              |
| Mean thickness of the coelomic epithelium of the dorsal mesentery                         | 4.13 ± 1.66 µm <sup>a</sup>                             | 2.70 ± 0.97 µm <sup>a</sup>                               | 3.81 ± 1.01 µm <sup>a</sup>                                 |
|                                                                                           |                                                         |                                                           |                                                             |
| Mean thickness of the cortex in the differentiating ovaries                               | 36.4 ± 6.8 µm                                           | 35.2 ± 5.4 µm                                             | 20.5 ± 4.4 µm                                               |
| Mean thickness of the cortex in the differentiating testes                                | 15.6 ± 5.4 µm <sup>a</sup>                              | 19.8 ± 4.8 µm <sup>a</sup>                                | -                                                           |
|                                                                                           |                                                         |                                                           |                                                             |
| Mean diameter of the medulla in the differentiating ovaries                               | 65.3 ± 8.7 µm                                           | 107.4 ± 12.3 µm                                           | 64.3 ± 9.2 µm                                               |
| Mean diameter of the medulla in the differentiating testes                                | 66.9 ± 7.5 µm                                           | 71.2 ± 8.2 µm <sup>a</sup>                                | -                                                           |
|                                                                                           |                                                         |                                                           |                                                             |
| Mean number of germ cells per cross-section of the cortex of the differentiating ovaries  | 3.3 ± 0.7                                               | 5.2 ± 2.2                                                 | 4.6 ± 1.2                                                   |
| Mean number of germ cells per cross-section in the cortex of the differentiating testes   | 0.9 ± 0.9 <sup>a</sup>                                  | 0.7 ± 0.7 <sup>a</sup>                                    | -                                                           |
|                                                                                           |                                                         |                                                           |                                                             |
| Mean number of germ cells per cross-section in the medulla of the differentiating ovaries | 0.8 ± 0.8                                               | 0.2 ± 0.4                                                 | 1.2 ± 0.6                                                   |
| Mean number of germ cells per cross-section in the medulla of the differentiating testes  | 2.8 ± 0.9 <sup>a</sup>                                  | 2.4 ± 1.1 <sup>a</sup>                                    | -                                                           |

<sup>a</sup> Significant difference between ovaries and testes ( $\chi^2$  test,  $P < 0.05$ ).
